# Supplementary material for: Designing few-layered graphitic carbons with atomic-sized cobalt hydroxide by harnessing hollow metal–organic frameworks
Source: Royal Society of Chemistry journal article supplement (doi:10.1039/d4na00203b), 2024-01-01
Supplement: d4na00203b1.pdf [file d4na00203b1.pdf]

## Supporting Information

# Designing Few-Layered Graphitic Carbons with Atomic-sized Cobalt Hydroxide by Harnessing Hollow Metal-Organic Frameworks

Eun Jin Cho,<sup>a‡</sup> Bo-Min Kim,<sup>a‡</sup> WooYeon Moon,<sup>b</sup> Dong Gyu Park,<sup>c</sup> Young-Wan Ju,<sup>d</sup> Won Ho Choi<sup>\*e</sup> and Jeeyoung Shin<sup>\*a,c</sup>

<sup>a</sup> *Department of Mechanical Systems Engineering, Sookmyung Women's University, Seoul 04310, Republic of Korea*

<sup>b</sup> *Department of Chemical and Biological Engineering, Sookmyung Women's University, Seoul 04310, Republic of Korea*

<sup>c</sup> *Institute of Advanced Materials and Systems, Sookmyung Women's University, Seoul, 04310, Republic of Korea*

<sup>d</sup> *Department of Chemical Engineering, College of Engineering, Wonkwang University, Iksan-si 54538, Republic of Korea*

<sup>e</sup> *Department of Petrochemical Materials, Chonnam National University, Yeosu-si 59631, Republic of Korea*

*‡These authors equally contributed to this manuscript.*

*\*E-mail: wonhochoi@jnu.ac.kr, jshin@sookmyung.ac.kr*

Figure S1. SEM image of ZIF-67

Figure S2. SEM image of c-ZIF-67

Figure S3. TEM image of ZIF-67

Figure S4. TEM image of c-ZIF-67

Figure S5. Zoom-in TEM image of c-ZIF-67

Figure S6. TEM image of c-hZIF-8

Figure S7. Zoom-in TEM image of c-hZIF-8

Figure S8. SEM image of ZIF-67@ZIF-8

Figure S9. TEM and EDS image of ZIF-67@ZIF-8

Figure S10 SEM image of hZIF-8

Figure S11. TEM image of hZIF-8

Figure S12. SEM image of c-hZIF-8

Figure S13. FT-IR spectra of ZIF-8, hZIF-8, and c-hZIF-8

Figure S14. Raman Spectra of c-hZIF-8, c-ZIF-67, and graphite

Figure S15. Nitrogen adsorption-desorption isotherms of ZIF-67, c-ZIF-67, hZIF-8, and c-hZIF-8

Figure S16. Nitrogen adsorption-desorption isotherms of c-ZIF-67 and c-hZIF-8

Figure S17. Pore distribution of ZIF-67, c-ZIF-67, hZIF-8, and c-hZIF-8

Figure S18. Pore distribution of c-ZIF-67 and c-hZIF-8

Figure S19. SEM image of  $\text{Co(OH)}_2\text{c-hZIF-8}$

Figure S20. SEM image of  $\text{Co(OH)}_2\text{c-ZIF-67}$

Figure S21. TEM image of  $\text{Co(OH)}_2\text{c-hZIF-8}$

Figure S22. XPS survey of hZIF-8, c-hZIF-8, and  $\text{Co(OH)}_2\text{c-hZIF-8}$

Figure S23. XPS survey of ZIF-67, c-ZIF-67, and  $\text{Co(OH)}_2\text{c-ZIF-67}$

Figure S24. XPS Co 2p, N 1s, and C 1s spectra of ZIF-67, c-ZIF-67, and  $\text{Co(OH)}_2\text{c-ZIF-67}$

Figure S25. FT-IR spectra of c-hZIF-8 and  $\text{Co(OH)}_2\text{c-hZIF-8}$

Figure S26. Capacitance Retention Rate of  $\text{Co(OH)}_2\text{c-hZIF-8}$  and  $\text{Co(OH)}_2\text{c-ZIF-67}$  during the activation step

Figure S27. Cyclic voltammetry curve of  $\text{Co(OH)}_2\text{c-hZIF-8}$  during the activation step

Figure S28. Cyclic voltammetry curve peak shift of  $\text{Co(OH)}_2\text{c-hZIF-8}$

Figure S29. Cyclic voltammetry curve peak shift of  $\text{Co(OH)}_2\text{c-ZIF-67}$

Figure S30. Cyclic voltammetry curve monitored every 2000 cycles of  $\text{Co(OH)}_2\text{c-ZIF-67}$

Figure S31. Cyclic voltammetry curve of  $\text{Co(OH)}_2\text{c-hZIF-8}$  at 0.5 to 50  $\text{mV}\cdot\text{s}^{-1}$

Figure S32. Cyclic voltammetry curve of  $\text{Co(OH)}_2\text{c-ZIF-67}$  at 0.5 to 50  $\text{mV}\cdot\text{s}^{-1}$

Figure S33. Galvanostatic charge-discharge curve of c-hZIF-8 at 1 to 10  $\text{A}\cdot\text{g}^{-1}$

**Figure S34. Galvanostatic charge-discharge curve of c-ZIF-67 at 1 to 10 A·g<sup>-1</sup>**

**Table S1. BET Specific surface area, average pore diameter, and total pore volume of ZIF-67, c-ZIF-67, hZIF-8, and c-hZIF-8**

**Table S2. The specific capacitance of Co(OH)<sub>2</sub>/c-hZIF-8 at different current densities**

**Table S3. The specific capacitance of Co(OH)<sub>2</sub>/c-ZIF-67 at different current densities**

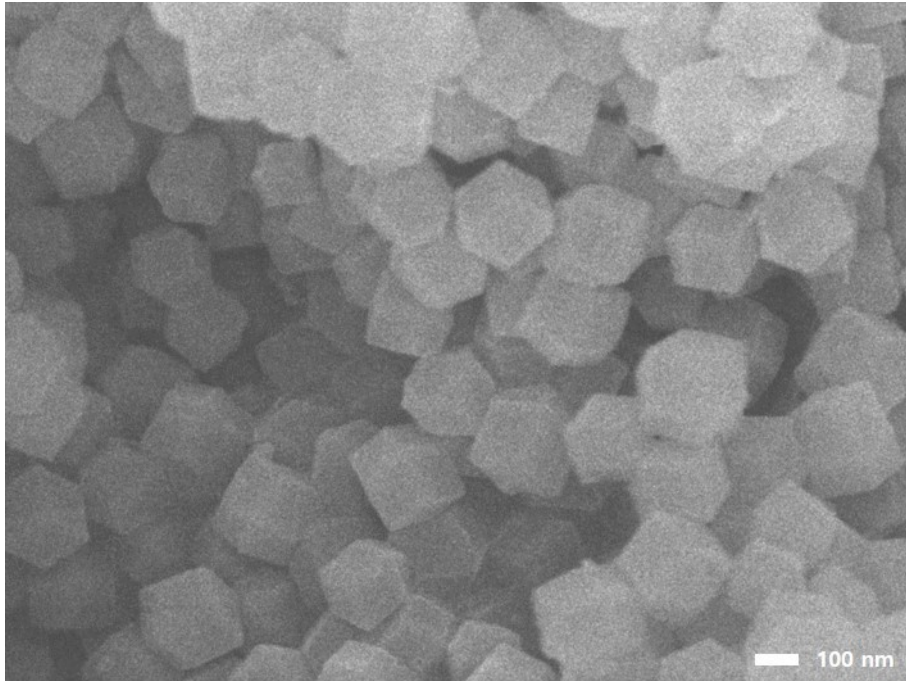

**Figure S1. SEM image of ZIF-67**

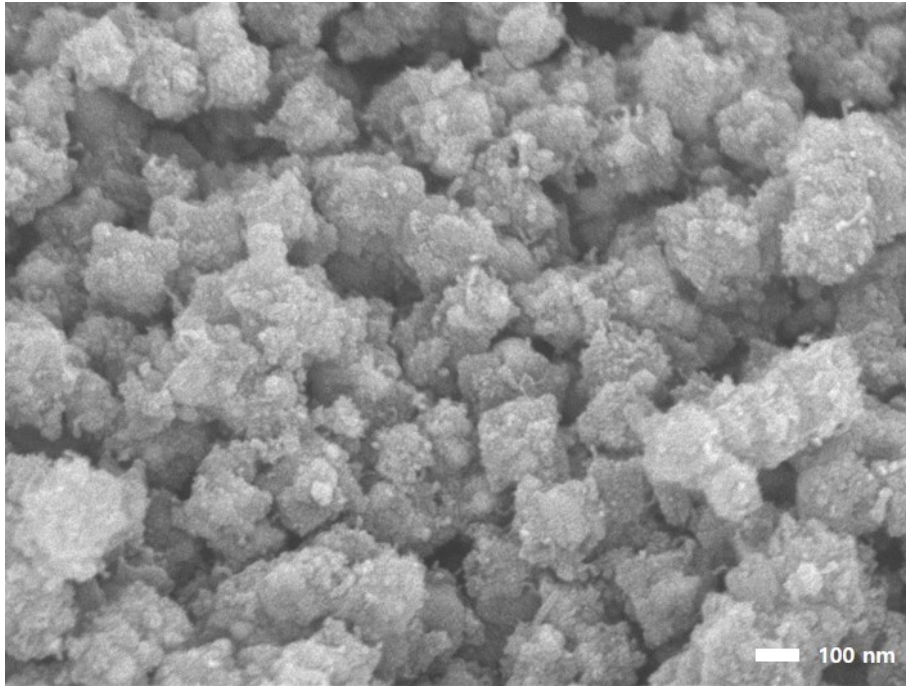

**Figure S2. SEM image of c-ZIF-67**

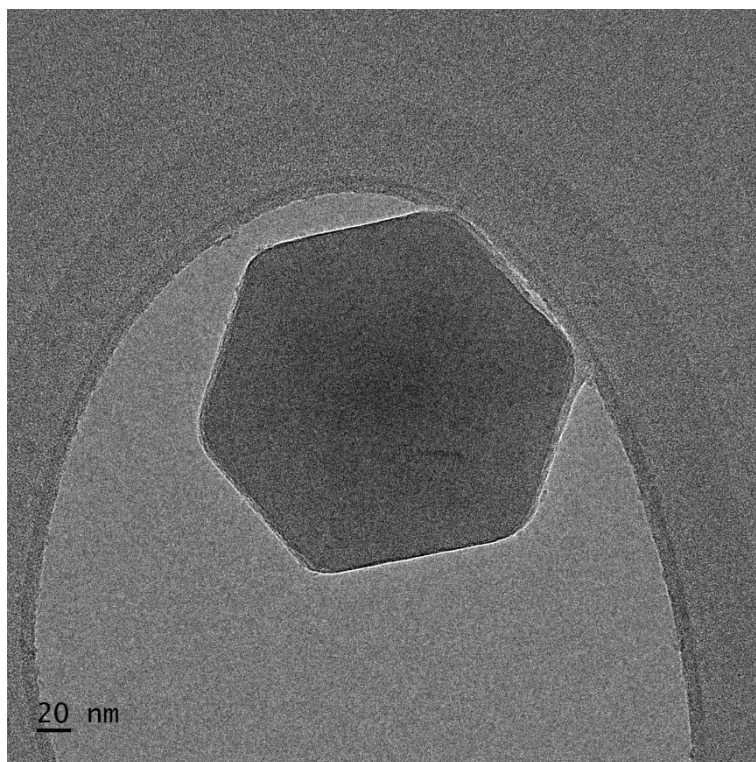

**Figure S3. TEM image of ZIF-67**

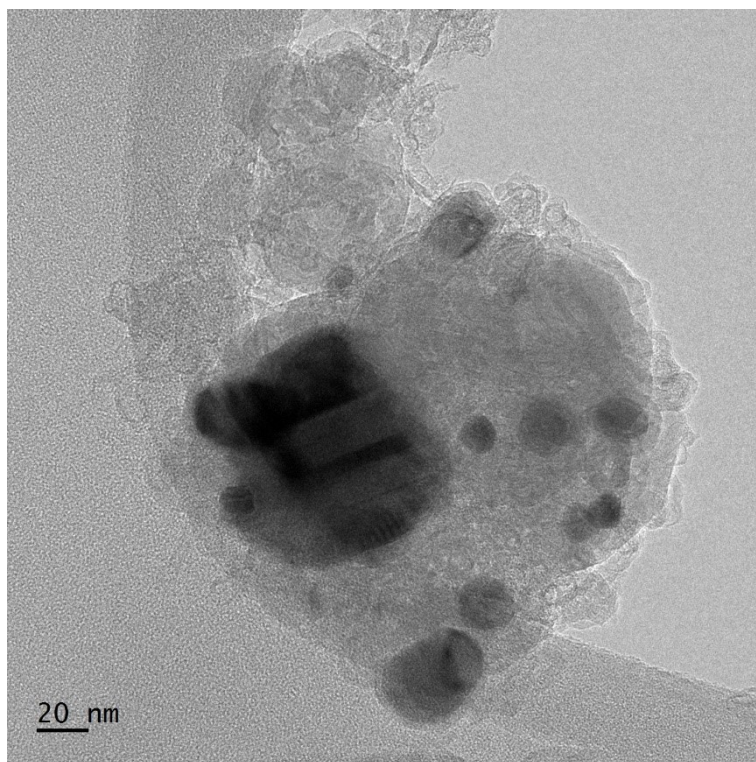

**Figure S4. TEM image of c-ZIF-67**



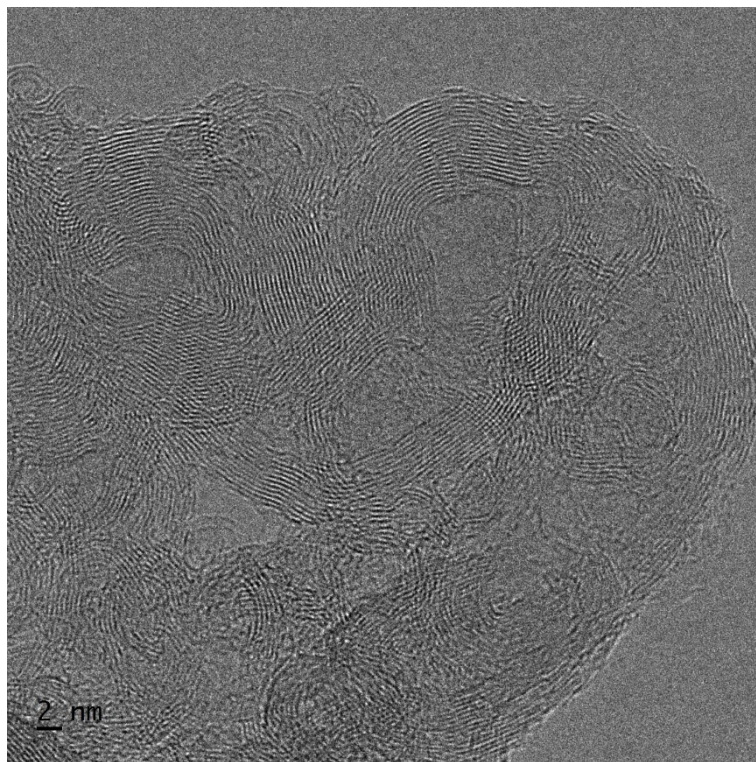

**Figure S5. Zoom-in TEM image of c-ZIF-67**



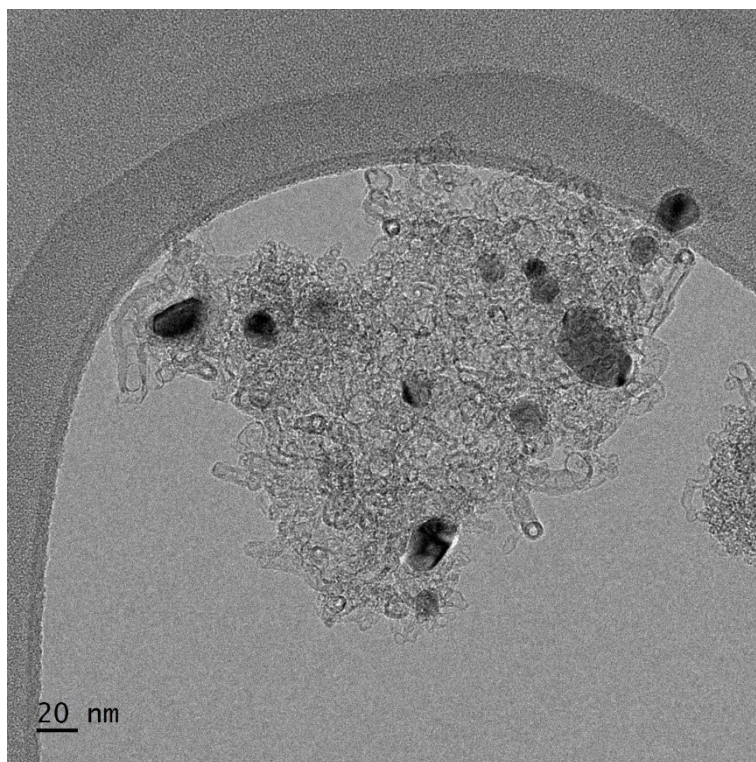

**Figure S6. TEM image of c-hZIF-8**

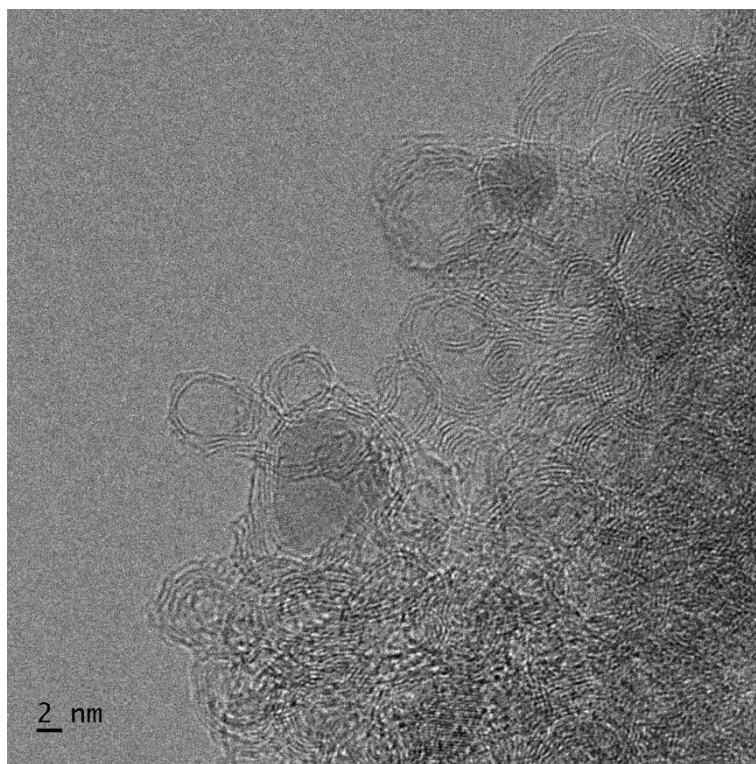

**Figure S7. Zoom-in TEM image of c-hZIF-8**

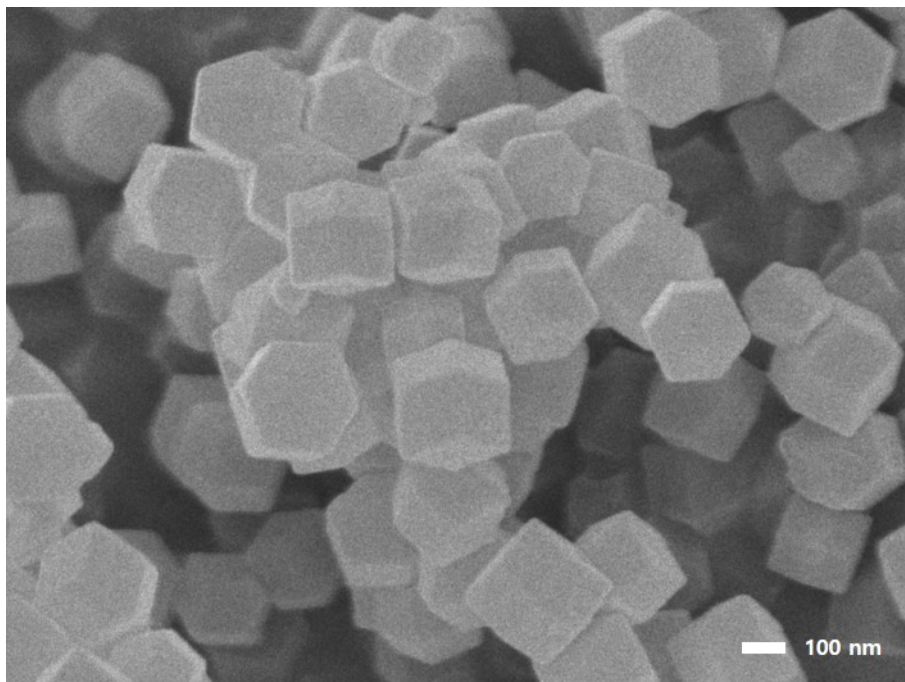

**Figure S8. SEM image of ZIF-67@ZIF-8**

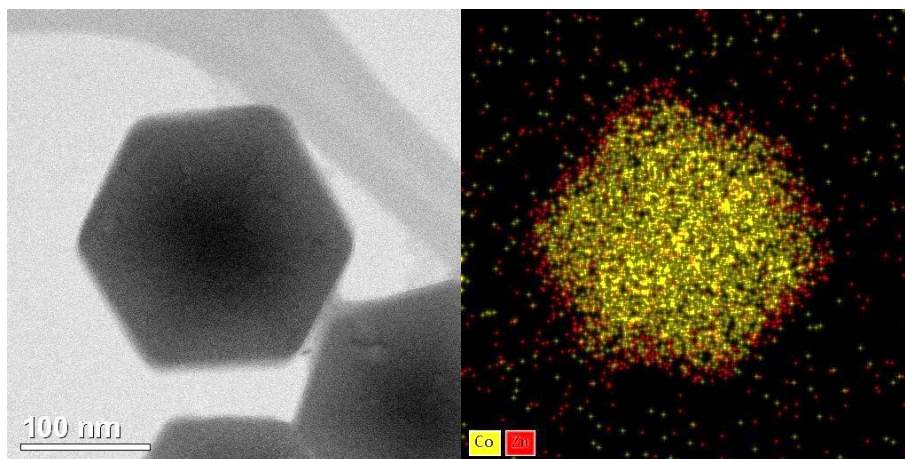

**Figure S9. TEM and EDS image of ZIF-67@ZIF-8**

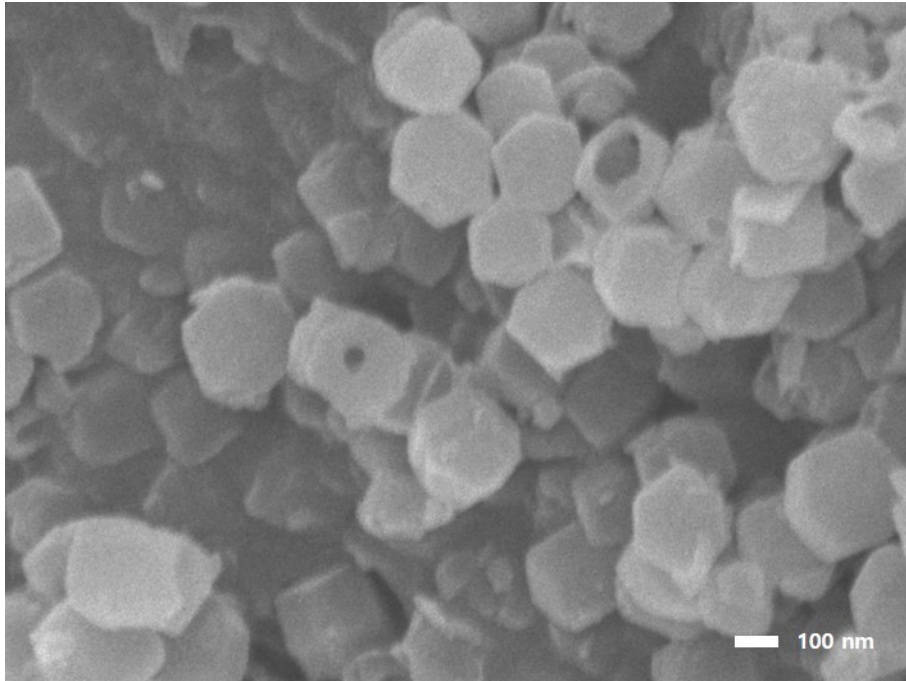

**Figure S10. SEM image of hZIF-8**



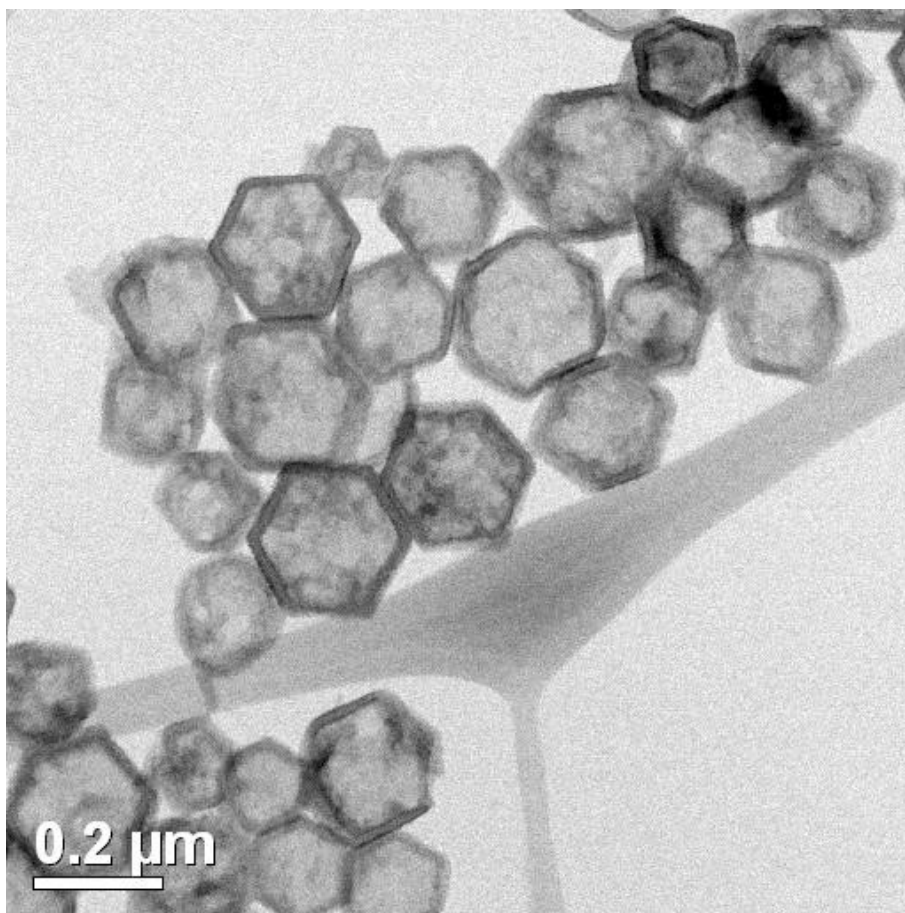

Figure S11. TEM image of hZIF-8



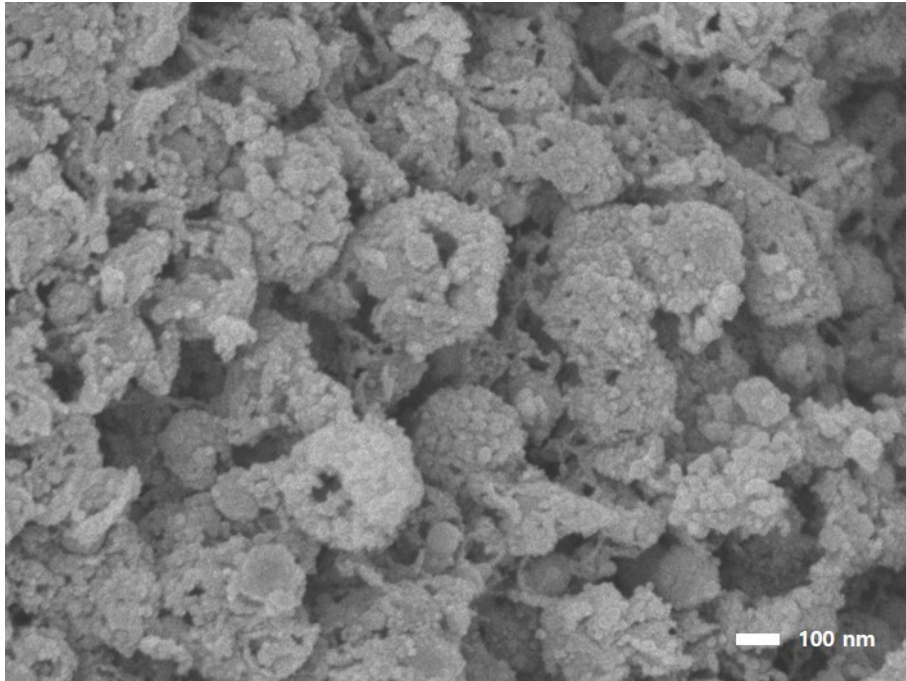

**Figure S12. SEM image of c-hZIF-8**

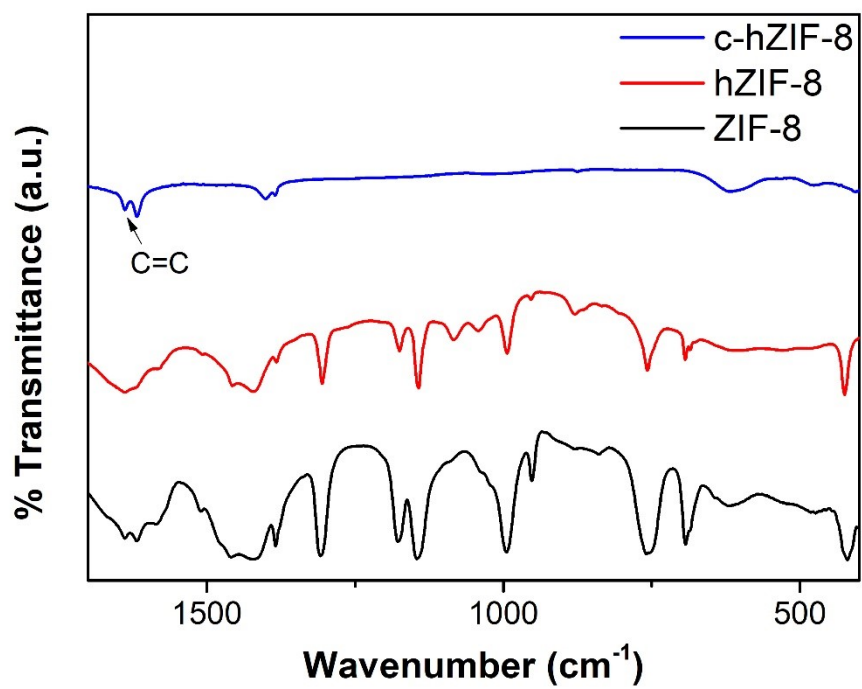

Figure S13. FT-IR spectra of ZIF-8, hZIF-8, and c-hZIF-8

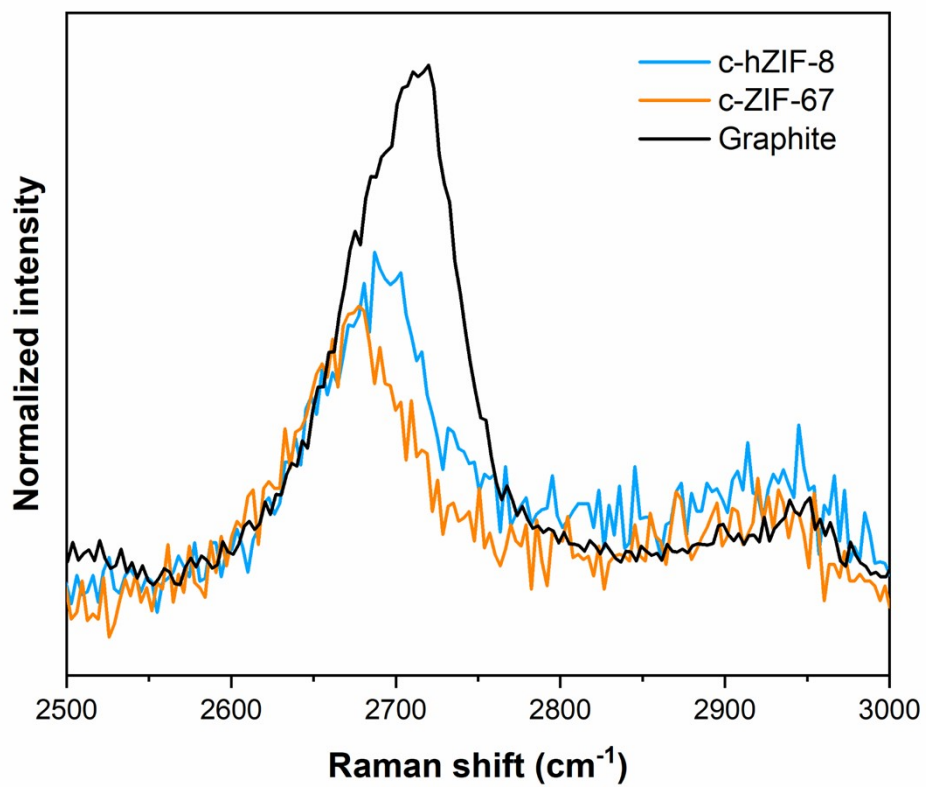

Figure S14. Raman Spectra of c-hZIF-8, c-ZIF-67, and graphite

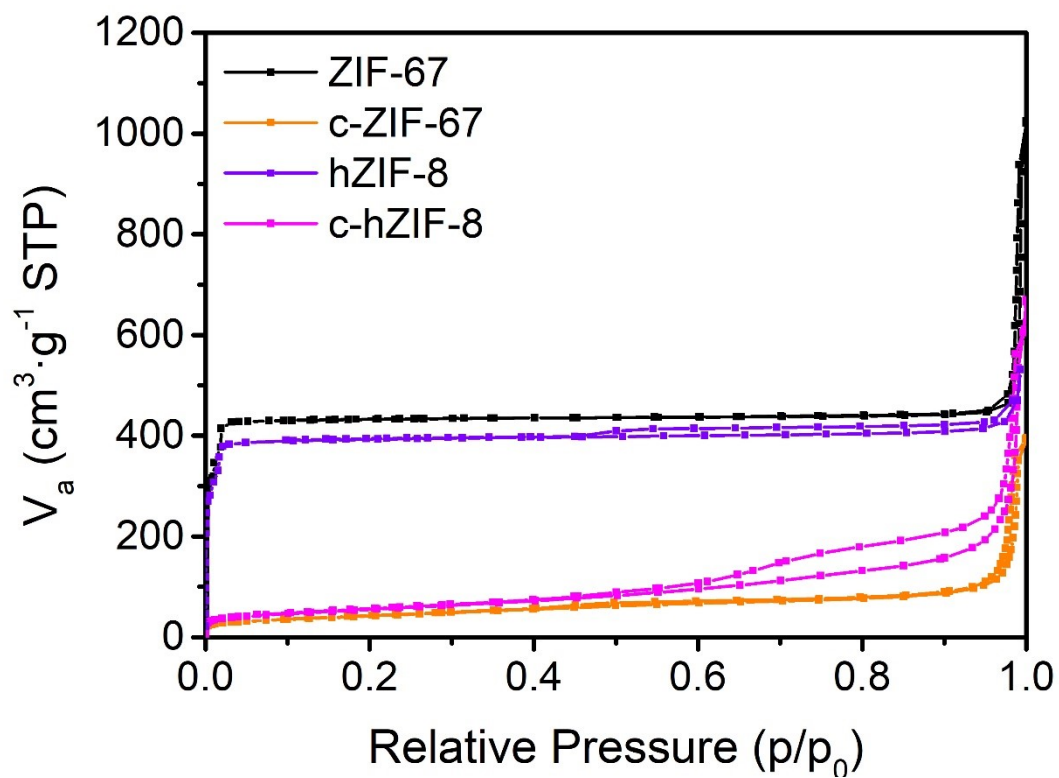

Figure S15. Nitrogen adsorption-desorption isotherms of ZIF-67, c-ZIF-67, hZIF-8, and c-hZIF-8

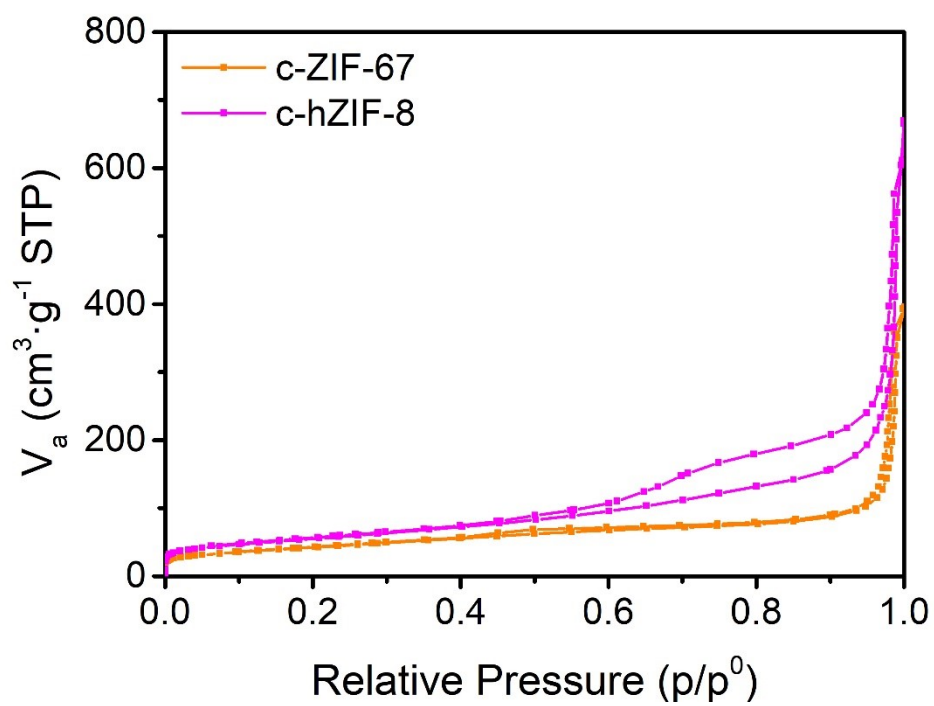

Figure S16. Nitrogen adsorption-desorption isotherms of c-ZIF-67 and c-hZIF-8

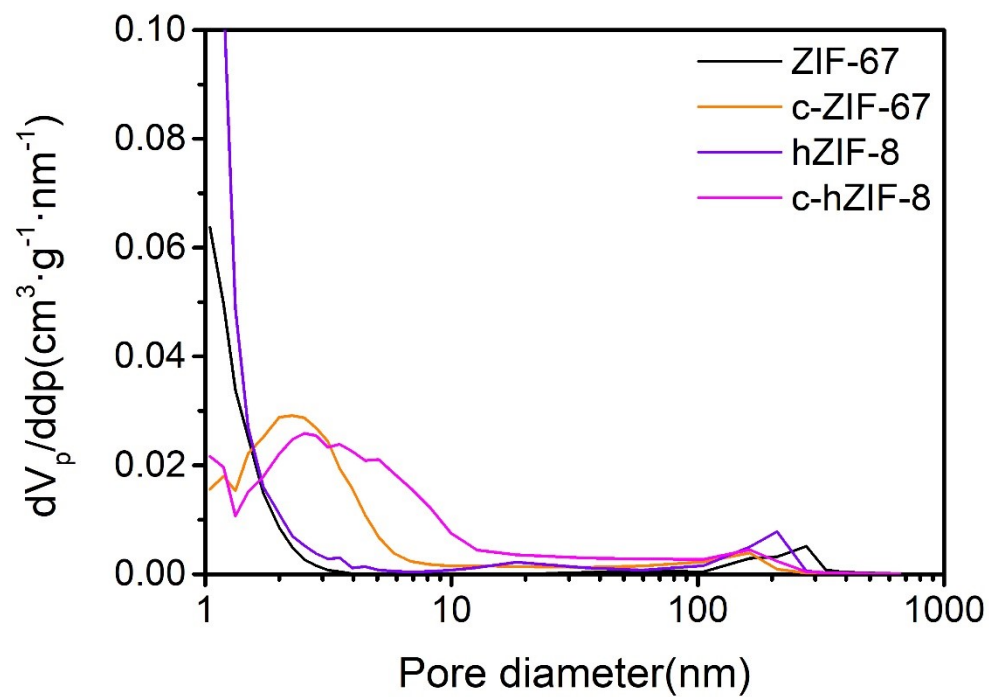

Figure S17. Pore distribution of ZIF-67, c-ZIF-67, hZIF-8, and c-hZIF-8



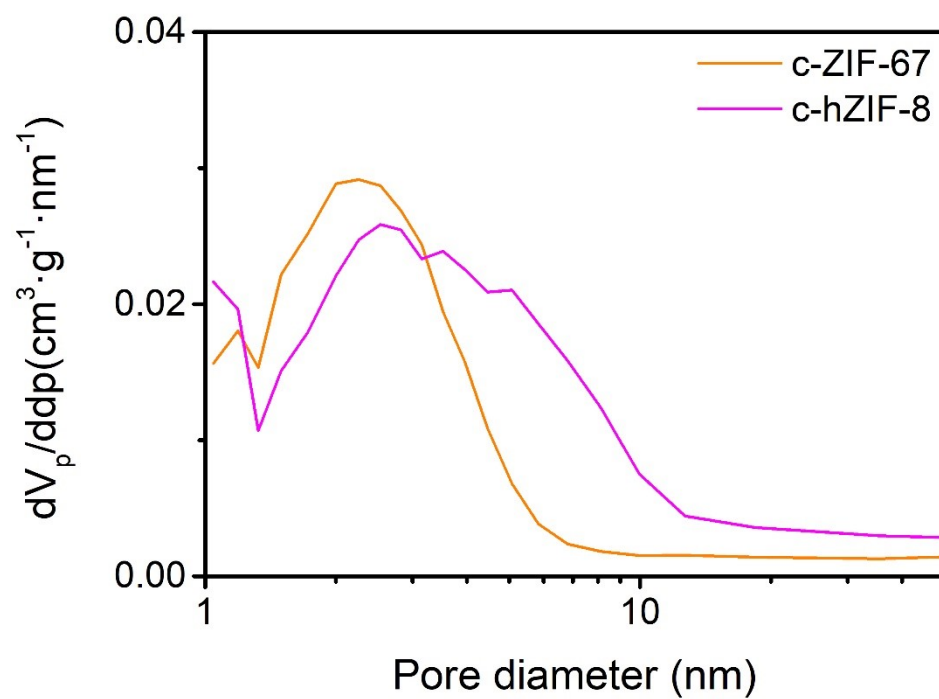

Figure S18. Pore distribution of c-ZIF-67 and c-hZIF-8

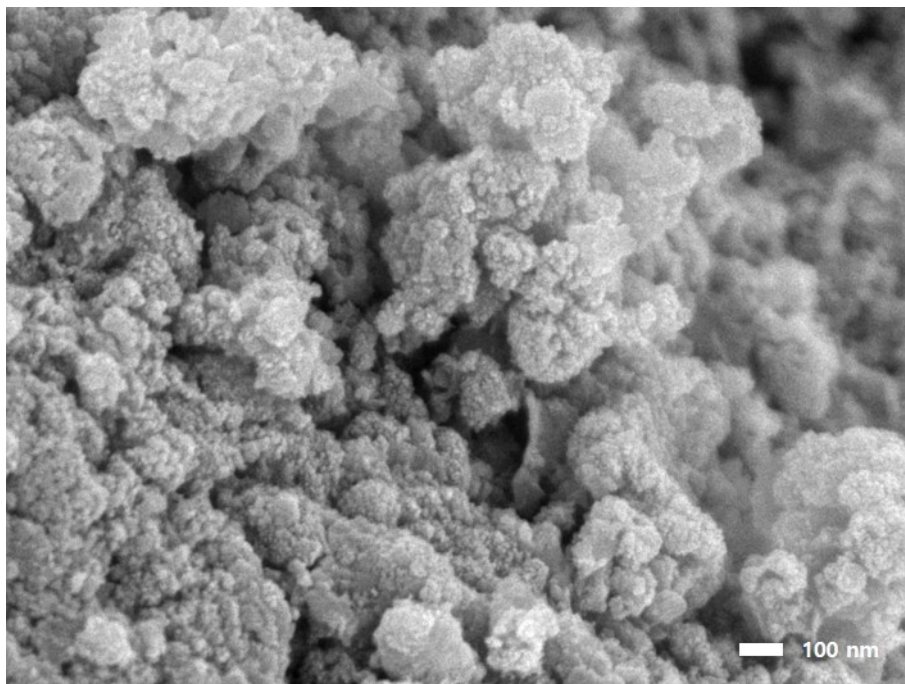

**Figure S19.** SEM image of Co(OH)<sub>2</sub>@c-hZIF-8

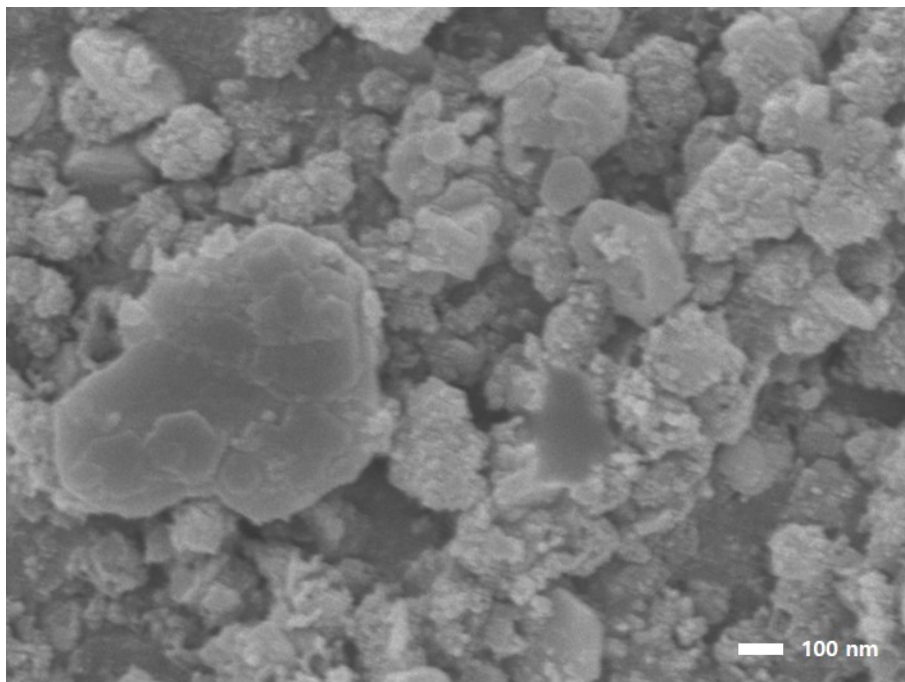

**Figure S20.** SEM image of  $\text{Co(OH)}_2@c\text{-ZIF-67}$

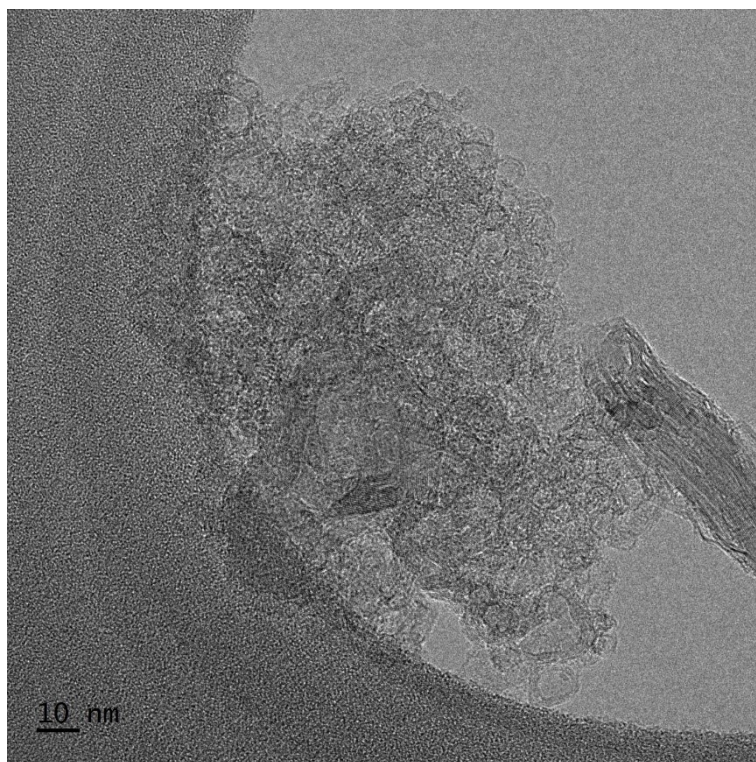

Figure S21. TEM image of  $\text{Co(OH)}_2@c\text{-hZIF-8}$

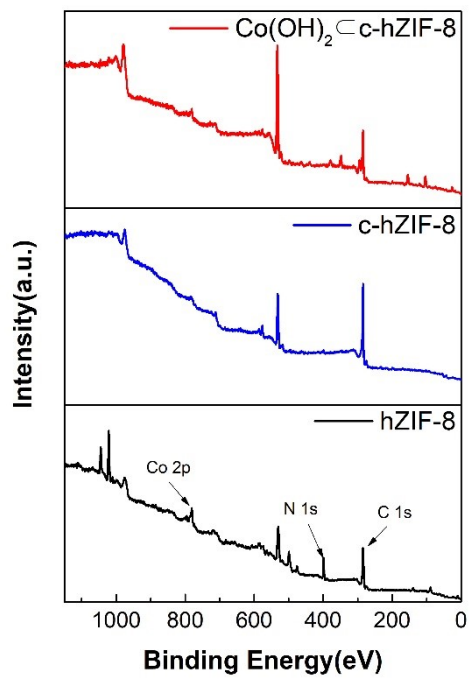

Figure S22. XPS survey of hZIF-8, c-hZIF-8, and  $\text{Co(OH)}_2@c\text{-hZIF-8}$

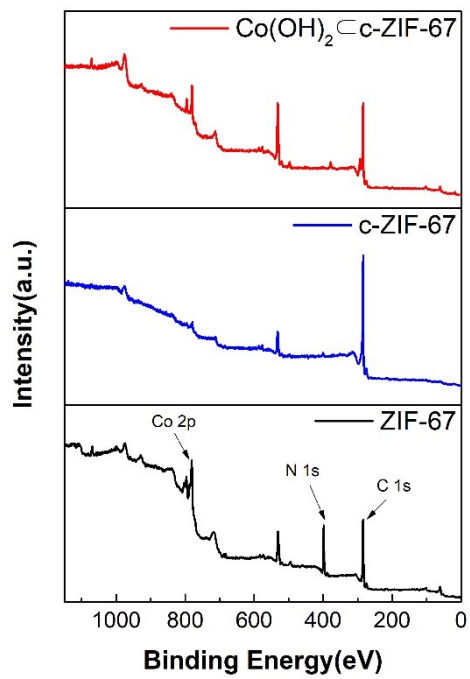

Figure S23. XPS survey of ZIF-67,  $c\text{-ZIF-67}$ , and  $\text{Co(OH)}_2@c\text{-ZIF-67}$



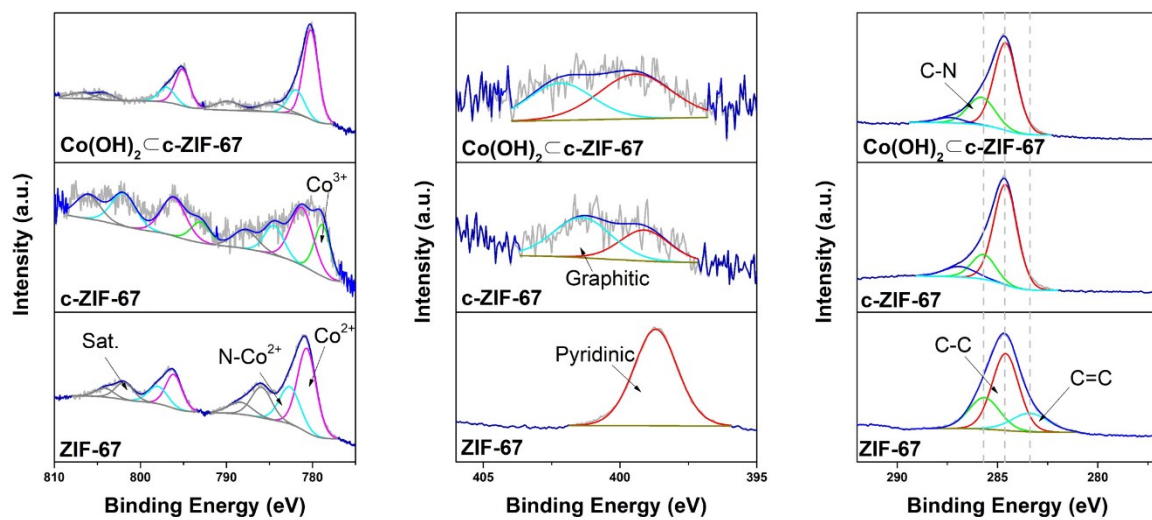

Figure S24. XPS Co 2p, N 1s, and C 1s spectra of ZIF-67,  $c\text{-ZIF-67}$ , and  $\text{Co(OH)}_2@c\text{-ZIF-67}$

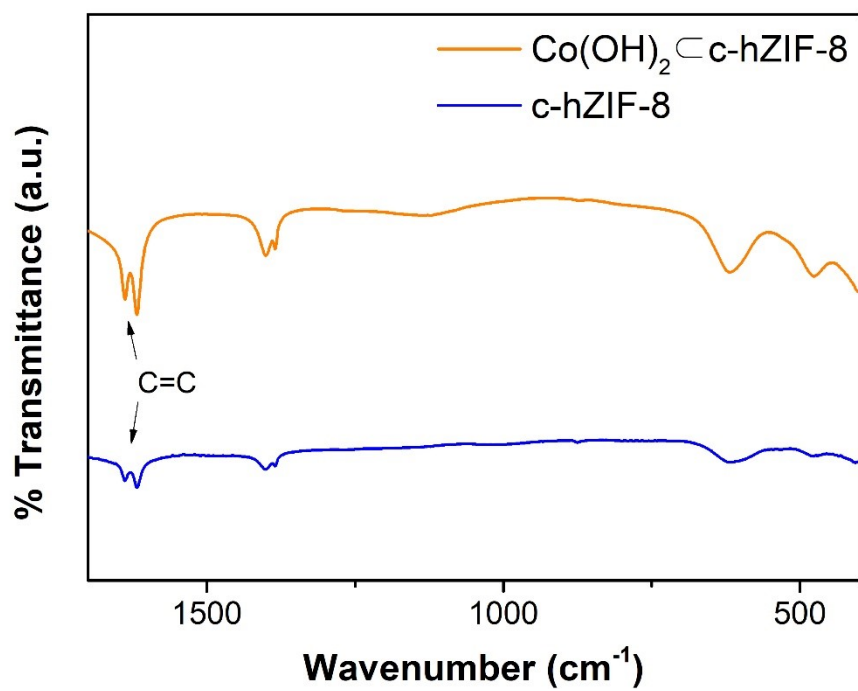

Figure S25. FT-IR spectra of c-hZIF-8 and Co(OH)<sub>2</sub>@c-hZIF-8

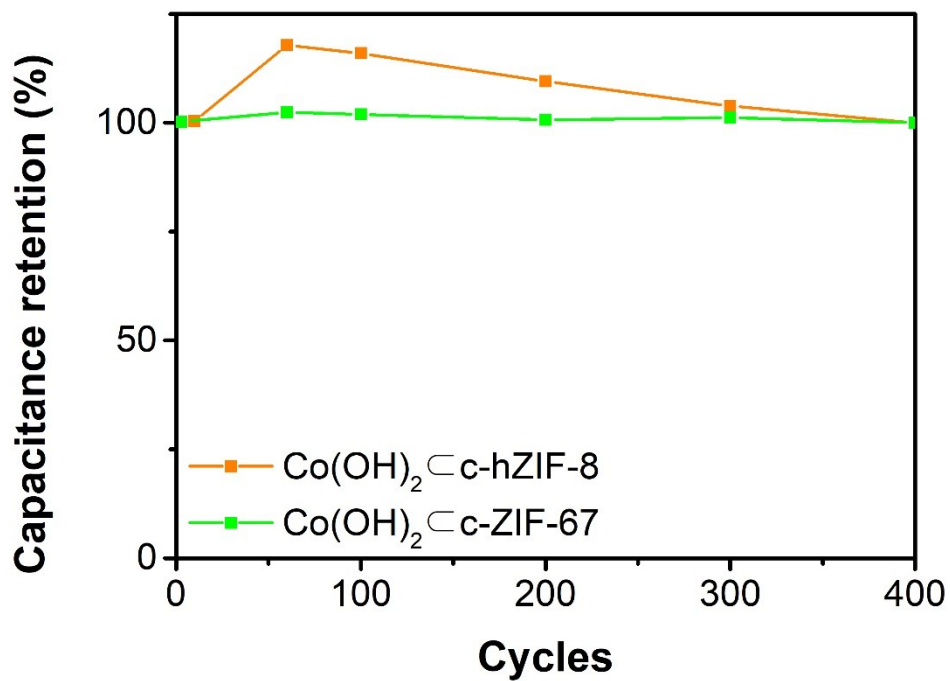

Figure S26. Capacitance Retention Rate of Co(OH)<sub>2</sub>@c-hZIF-8 and Co(OH)<sub>2</sub>@c-ZIF-67 during activation step

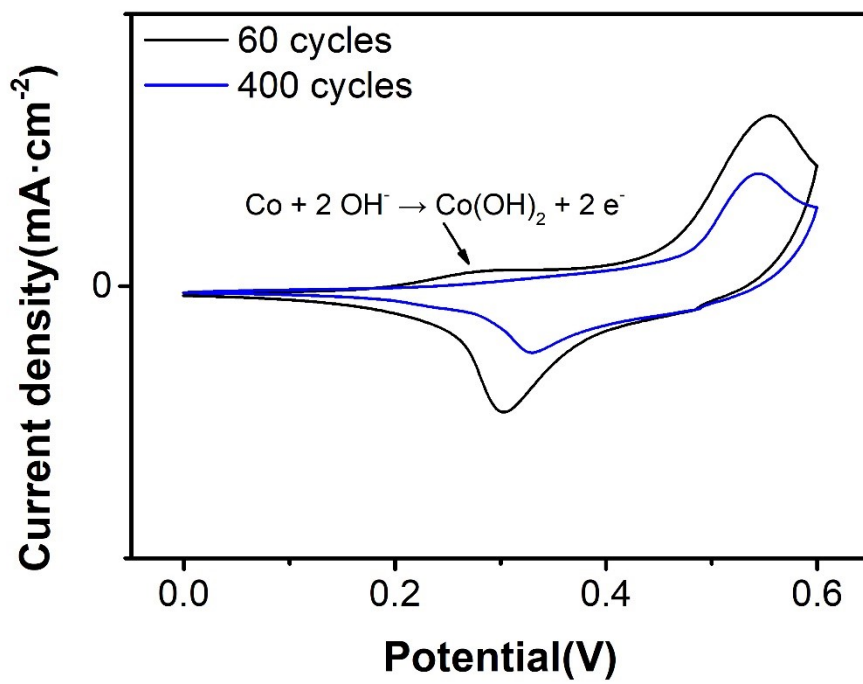

Figure S27. Cyclic voltammetry curve of Co(OH)<sub>2</sub>@c-hZIF-8 during the activation step

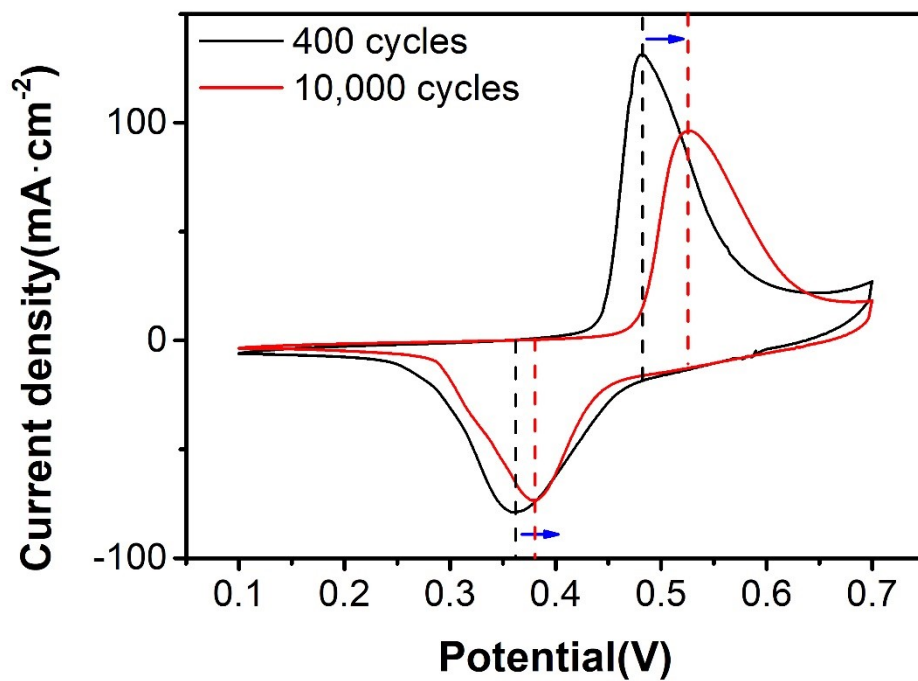

Figure S28. Cyclic voltammetry curve peak shift of  $\text{Co(OH)}_2 @ \text{c-hZIF-8}$

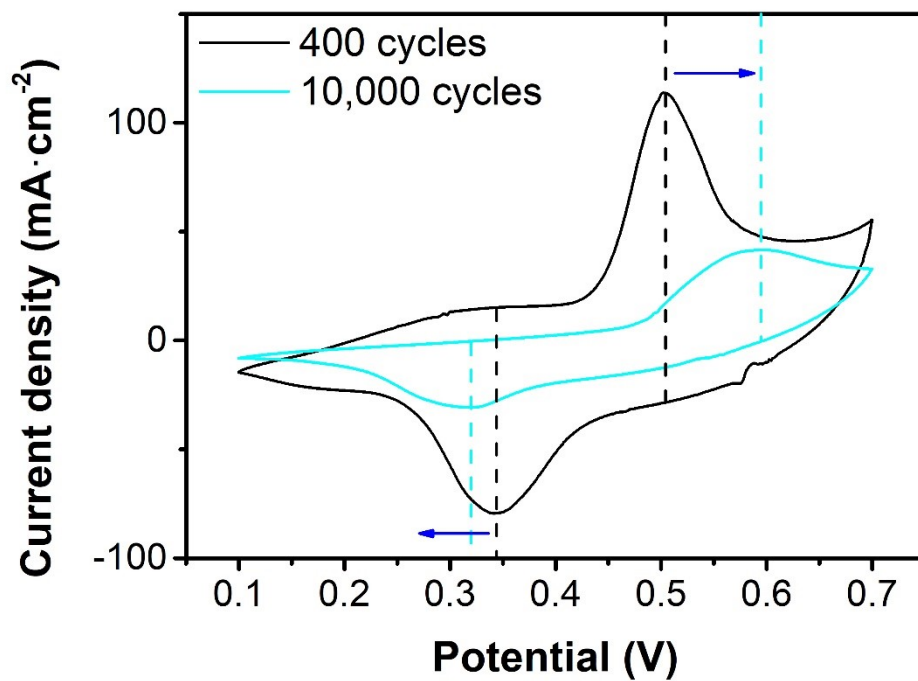

Figure S29. Cyclic voltammetry curve peak shift of  $\text{Co(OH)}_2@c\text{-ZIF-67}$

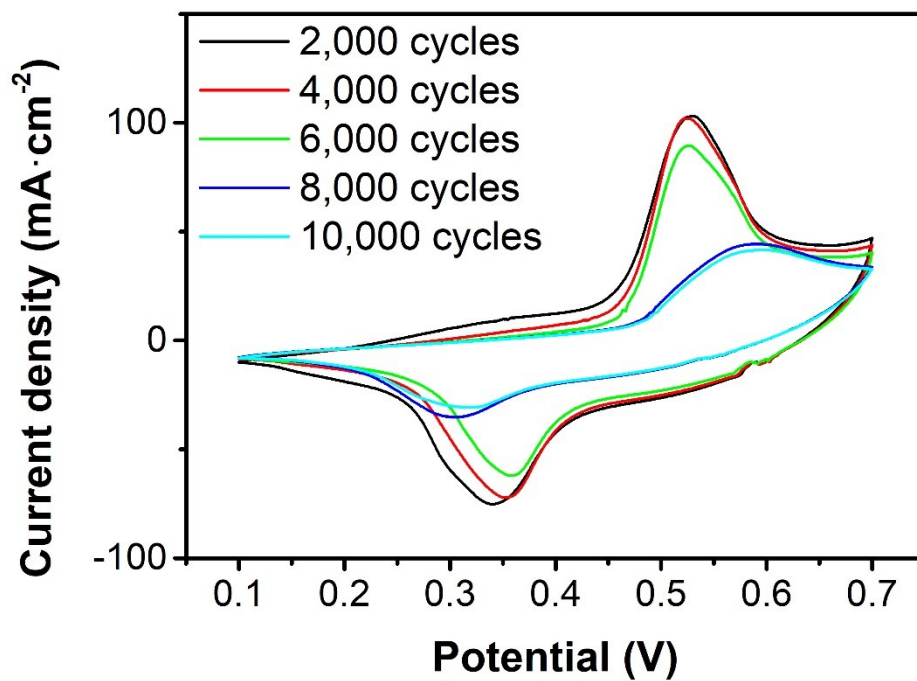

Figure S30. Cyclic voltammetry curve monitored every 2000 cycles of  $\text{Co(OH)}_2@c\text{-ZIF-67}$

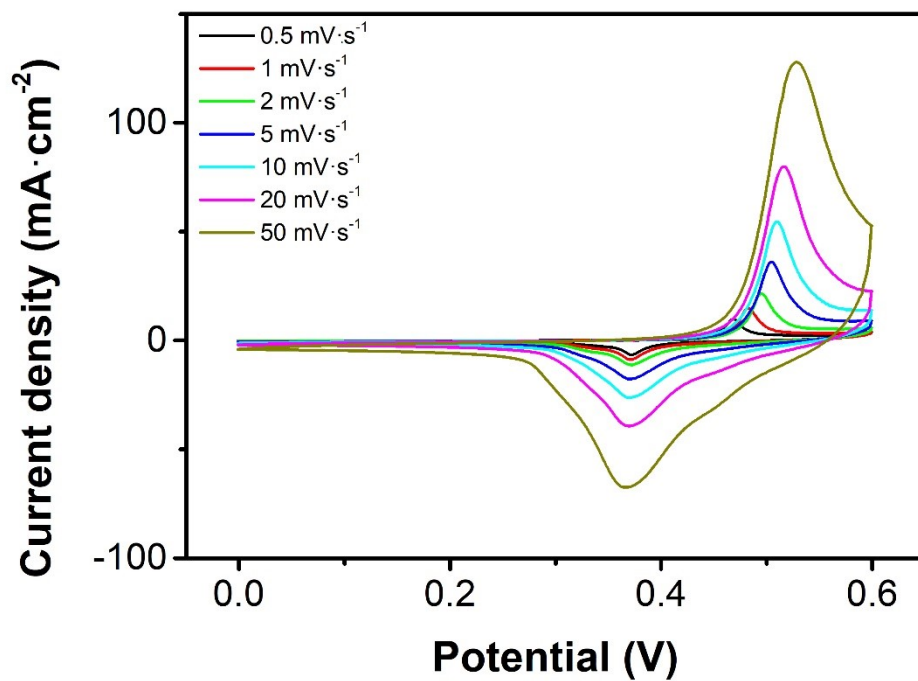

Figure S31. Cyclic voltammetry curve of Co(OH)<sub>2</sub>@c-hZIF-8 at 0.5 to 50 mV·s<sup>-1</sup>



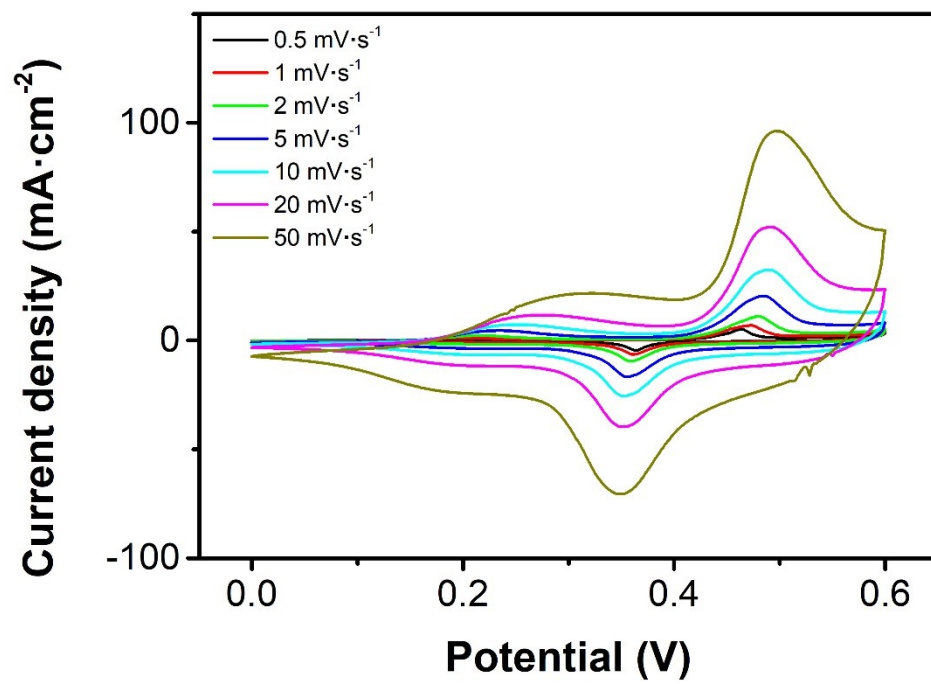

Figure S32. Cyclic voltammetry curve of Co(OH)<sub>2</sub>@c-ZIF-67 at 0.5 to 50 mV·s<sup>-1</sup>

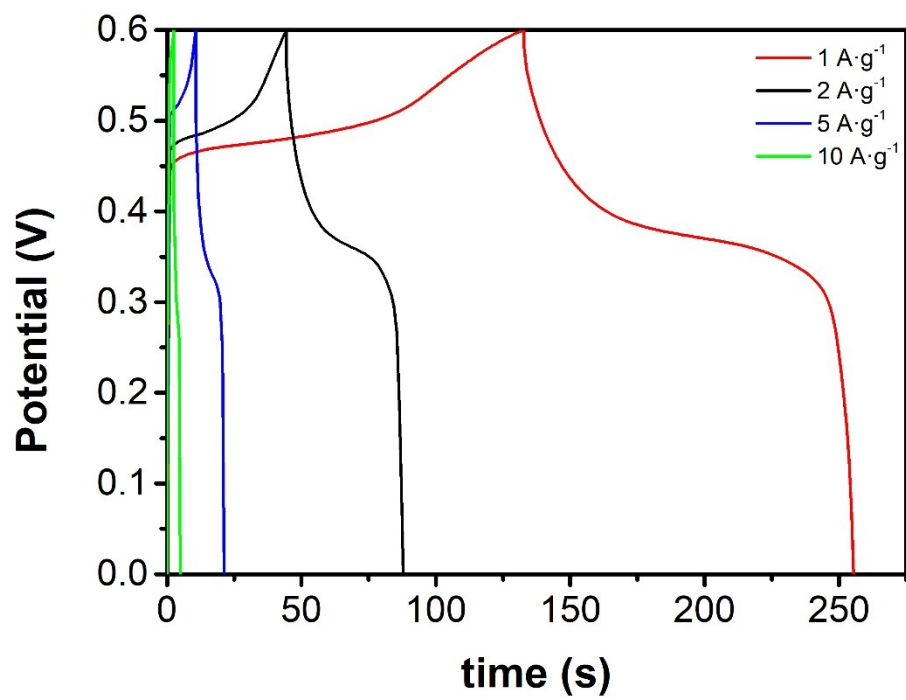

Figure S33. Galvanostatic charge-discharge curve of c-hZIF-8 at 1 to 10 A·g<sup>-1</sup>

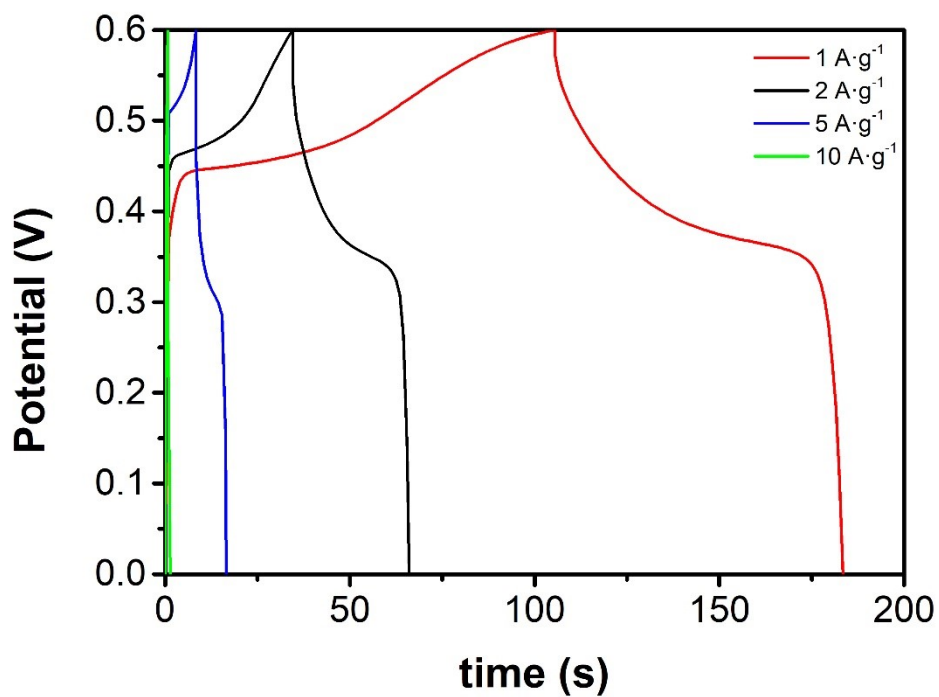

Figure S34. Galvanostatic charge-discharge curve of c-ZIF-67 at 1 to 10 A·g<sup>-1</sup>

|          | specific surface area<br>[m <sup>2</sup> ·g <sup>-1</sup> ] | average pore size<br>[nm] | Total pore volume<br>[cm <sup>3</sup> ·g <sup>-1</sup> ] |
|----------|-------------------------------------------------------------|---------------------------|----------------------------------------------------------|
| ZIF-67   | 1685                                                        | 2                         | 0.87                                                     |
| c-ZIF-67 | 154                                                         | 14                        | 0.53                                                     |
| hZIF-8   | 1063                                                        | 4                         | 0.72                                                     |
| c-hZIF-8 | 197                                                         | 17                        | 0.79                                                     |

**Table S1.** BET Specific surface area, average pore diameter, and total pore volume of ZIF-67, c-ZIF-67, hZIF-8, and c-hZIF-8

| <b>Current density<br/>[A·g<sup>-1</sup>]</b> | <b>Specific capacitance<br/>[F·g<sup>-1</sup>]</b> |
|-----------------------------------------------|----------------------------------------------------|
| 1                                             | 257.2                                              |
| 2                                             | 176.3                                              |
| 5                                             | 98.9                                               |
| 10                                            | 76.4                                               |

**Table S2. The specific capacitance of Co(OH)<sub>2</sub>/c-hZIF-8 at different current densities**

| <b>Current density<br/>[A·g<sup>-1</sup>]</b> | <b>Specific capacitance<br/>[F·g<sup>-1</sup>]</b> |
|-----------------------------------------------|----------------------------------------------------|
| 1                                             | 169.2                                              |
| 2                                             | 129.8                                              |
| 5                                             | 71.9                                               |
| 10                                            | 6.1                                                |

**Table S3. The specific capacitance of Co(OH)<sub>2</sub>/c-ZIF-67 at different current densities**
